# Supplementary material for: One-pot synthesis of monodisperse Zn coordination polymer micro/nanostructures and their transformation to mesoporous ZnO photocatalysts
Source: Royal Society of Chemistry journal article supplement (doi:10.1039/c4ra02610a), 2014-01-01
Supplement: c4ra02610a1.pdf [file c4ra02610a1.pdf]

## Supporting Information

### One-pot synthesis of monodisperse Zn coordination polymer micro/nanostructures and their transformation to mesoporous ZnO photocatalyst

Kun Liu, Huan Liu, Le-Le Yang, Fang-Yao Zhao, Yue Li\* and Wen-Juan Ruan\*

*Department of Chemistry, Collaborative Innovation Center of Chemical Science and Engineering (Tianjin),  
Nankai University, Tianjin 300071, China.*

*Email: wjruan@nankai.edu.cn, liyue84@nankai.edu.cn; Tel: (+86)-22-23501717*

#### Experimental details

**Synthesis of Zn-CPs.** All chemicals were obtained commercially and used as received without further purification. In a typical procedure, 3,5-pyridinedicarboxylic acid ( $\text{H}_2\text{pydc}$ , 0.1 mmol) and NaOH (0.2 mmol) were dissolved in the mixed solvent of THF (7.5 mL) and deionized water (6.5 mL) and stirred for a few minutes to prepare the solution of  $\text{Na}_2\text{pydc}$ . Then, 1 mL aqueous solution of  $\text{Zn}(\text{NO}_3)_2$  (0.1 M) was dropped into above  $\text{Na}_2\text{pydc}$  solution and a white precipitate was formed immediately. After 10 min of stirring, the precipitate was collected by centrifugation, washed with ethanol for three times, and dried at 60 °C for 6 h. The obtained sample was defined as Zn-CP-1.

The synthesis procedures of Zn-CP-2 and Zn-CP-3 are similar to that of Zn-CP-1 except that the  $\text{Na}_2\text{pydc}$  solution was prepared with the mixed solvent of DMSO/ $\text{H}_2\text{O}$  (7.5 mL/6.5 mL) and 1,4-dioxane/ $\text{H}_2\text{O}$  (15 mL/8 mL), respectively.

**Synthesis of ZnO micro/nanostructures.** ZnO samples were obtained by the calcination of Zn-based CPs in air at 500 °C for 1 h with a heating rate of 1 °C  $\text{min}^{-1}$ . The samples obtained from Zn-CP-1, Zn-CP-2 and Zn-CP-3 were named as ZnO-1, ZnO-2 and ZnO-3, respectively.

**Characterization of Zn-CP and ZnO samples.** Scanning electron microscope (SEM) images were taken with a JEOL JSM-7500F scanning electron microscope. Transmission electron microscopy (TEM) images were obtained with JEM-2010FEF transmission electron microscope operating at 200 kV. Powder X-ray diffraction (PXRD) was performed on a Rigaku D/max-2500 diffractometer with Cu K $\alpha$  radiation ( $\lambda=0.15406$  nm) at 40 kV and 100 mA. Elemental analysis (C, H, and N) was carried out with a Perkin-Elmer 240C analyzer. Thermogravimetric analysis (TGA) was operated on a Rigaku standard TG-DTA analyzer from ambient temperature to 700 °C with a heating rate of 10 °C  $\text{min}^{-1}$  in the air, and an empty  $\text{Al}_2\text{O}_3$  crucible was used as the reference. Fourier transform infrared spectroscopy (FT-IR) was measured using a MAGNA-560 Fourier transform infrared spectrometer with nujol mull method.  $\text{N}_2$  adsorption-desorption isotherm measurement was operated on a V-Sorb2800P surface area and pore size analyzer.

**Photocatalytic degradation experiments.** Rhodamine B (RhB) was used as the substrate to characterize the photocatalytic activities of the as-prepared ZnO powders. 40 mg of ZnO sample was dispersed into 80 mL aqueous solution of RhB (5 mg  $\text{L}^{-1}$ ). The suspension was sonicated for 20 min and stirred in dark for another 30 min to ensure the establishment of an adsorption-desorption equilibrium. Then, the suspension was exposed to the irradiation of a 500 W Xenon light source and sampled periodically. The degradation process of RhB was characterized with its absorption at 552 nm (measured by a UV-2450 spectrophotometer).

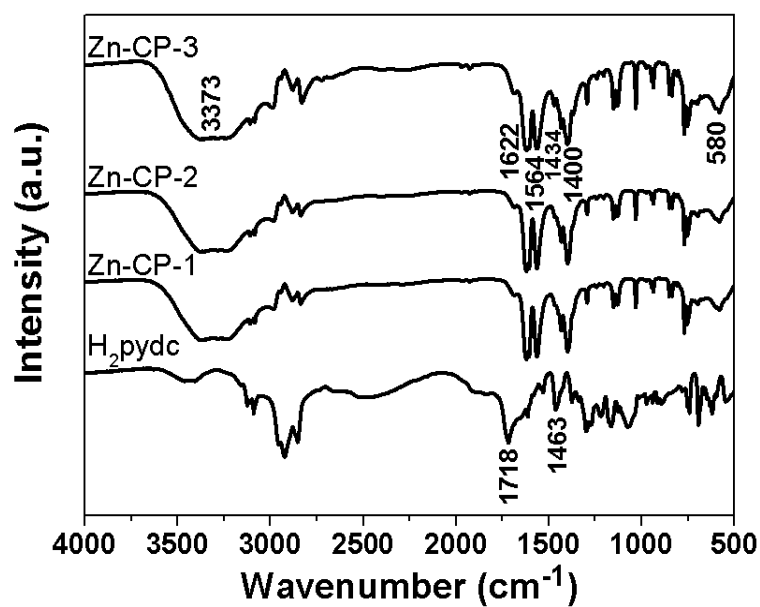

Fig. S1 FT-IR spectra of the as-prepared Zn-CPs and  $\text{H}_2\text{pydc}$  ligand.

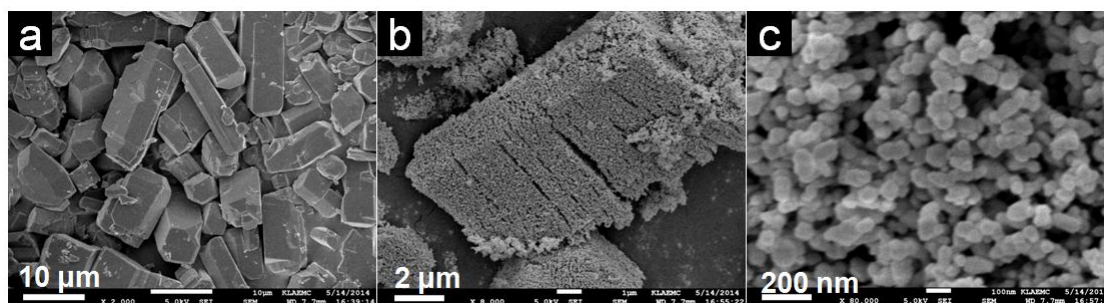

Fig. S2 SEM images of CP bulk crystals (a) and ZnO-bulk (b, c).

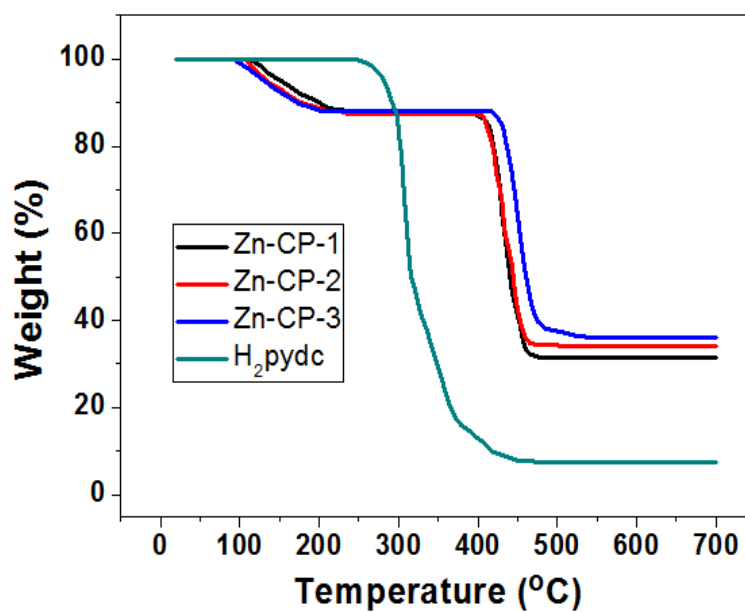

Fig. S3 TGA curves of the as-prepared Zn-CPs and  $\text{H}_2\text{pydc}$  ligand.

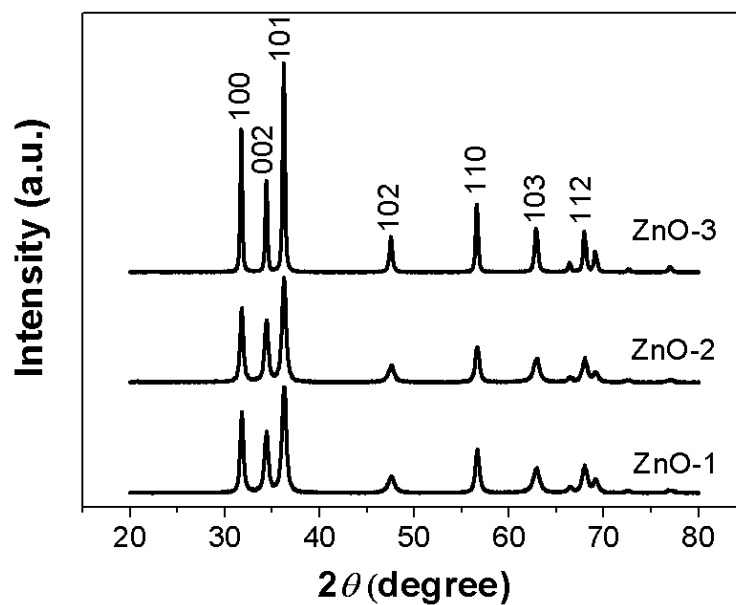

**Fig. S4** PXRD patterns of the as-prepared ZnO micro/nanostructures.

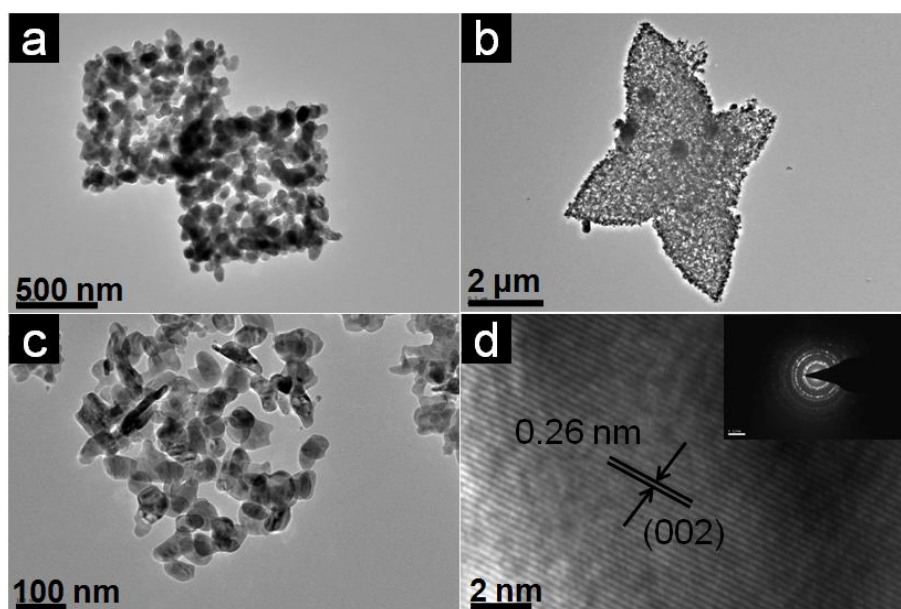

**Fig. S5** TEM images of the as-prepared ZnO micro/nanostructures: (a) ZnO-1, (b) ZnO-2, (c) ZnO-3. (d) The typical HRTEM image and SAED pattern (inset) of ZnO-2, the adjacent lattice fringe distance of 0.26 nm corresponds to the (002) facet of wurtzite.

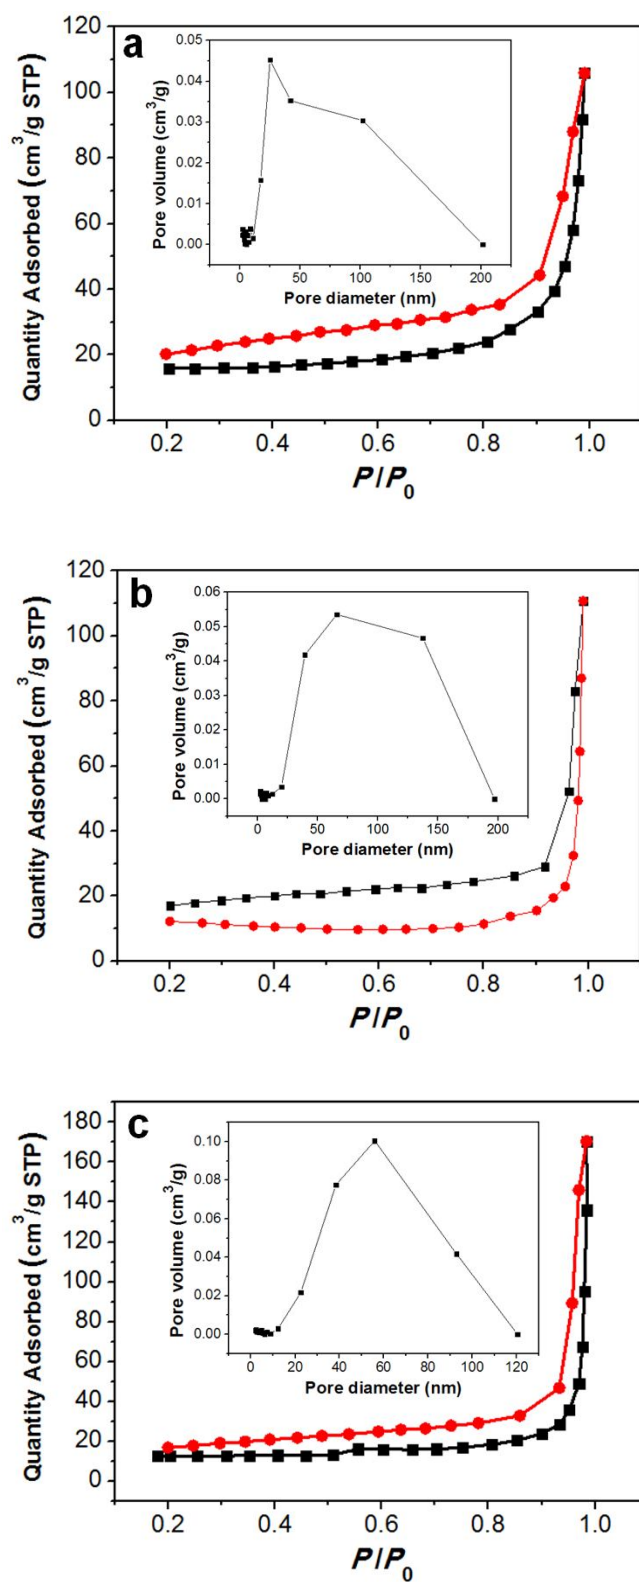

**Fig. S6**  $N_2$  adsorption-desorption isotherms of the as-prepared ZnO micro/nanostructures: (a) ZnO-1, (b) ZnO-2, (c) ZnO-3. Inset: the BJH pore-size distribution curves.

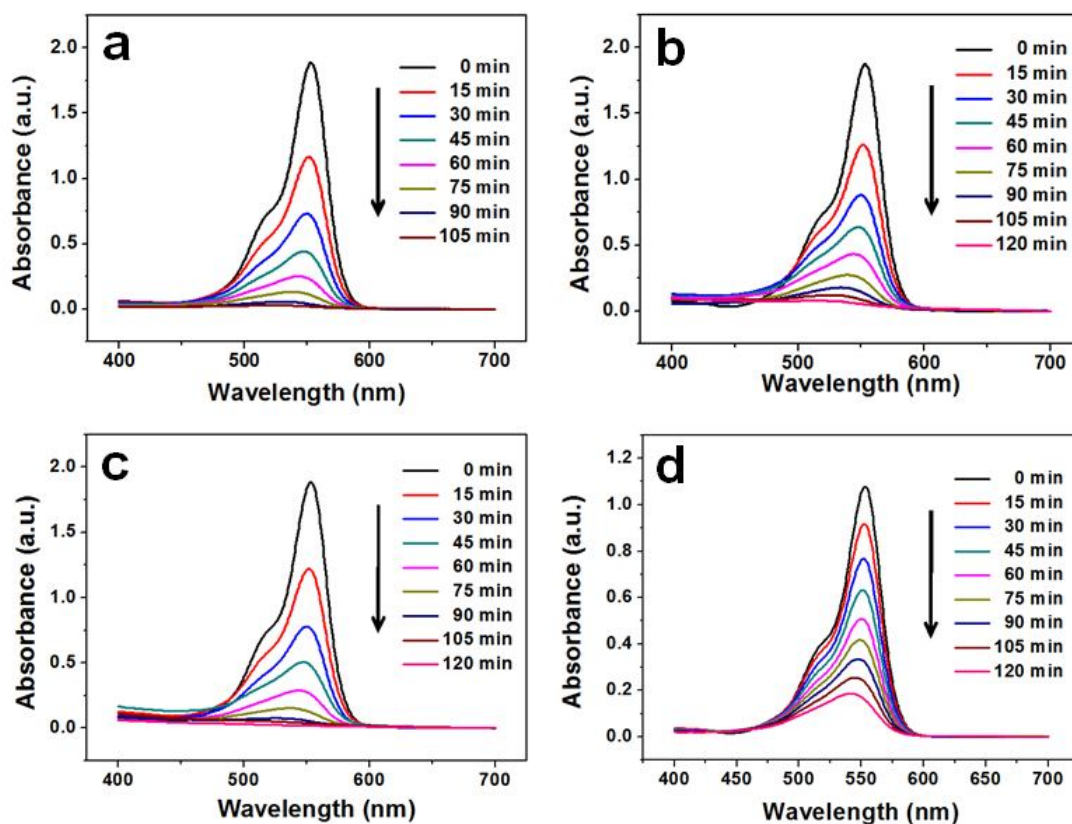

**Fig. S7** UV-Vis absorbance spectra of the RhB solution during the degradation process with different ZnO samples: (a) ZnO-1, (b) ZnO-2, (c) ZnO-3, (4) ZnO-bulk.

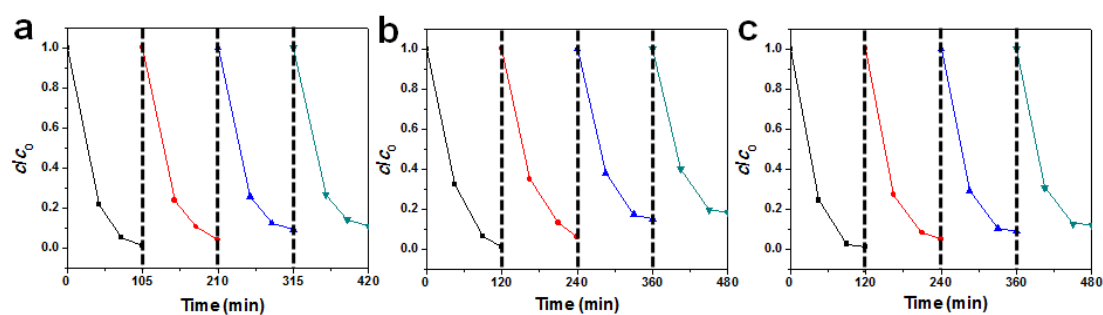

**Fig. S8** Cyclic photodegradation of RhB with as-prepared ZnO samples as photocatalysts,  $0.5 \text{ g L}^{-1}$  ZnO,  $5 \text{ mg L}^{-1}$  RhB. (a) ZnO-1, (b) ZnO-2, (c) ZnO-3.

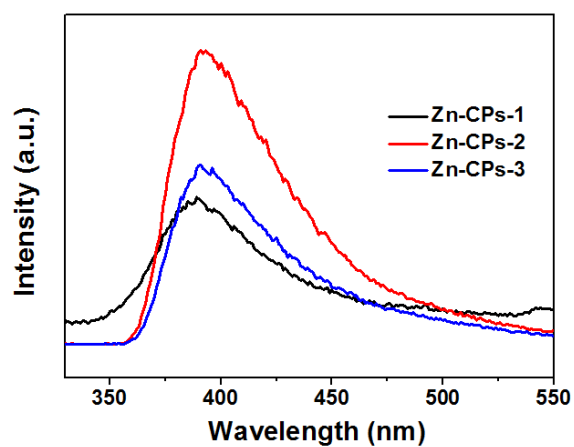

**Fig. S9** Solid-state photoluminescent spectra of Zn-CP-1–3,  $\lambda_{\text{ex}} = 300$  nm.

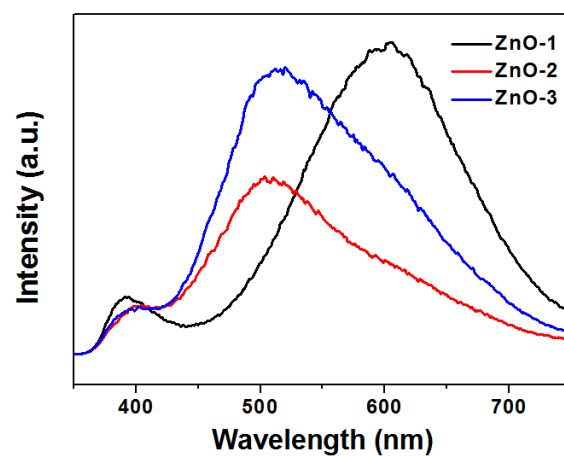

**Fig. S10** Solid-state photoluminescent spectra of ZnO-1–3,  $\lambda_{\text{ex}} = 320$  nm.

**Table S1** EA results of the as-prepared Zn-CPs.

| Zn-CPs                     | C%    | H%   | N%   |
|----------------------------|-------|------|------|
| Zn-CP-1                    | 31.16 | 3.05 | 5.14 |
| Zn-CP-2                    | 31.54 | 3.13 | 5.29 |
| Zn-CP-3                    | 31.78 | 3.39 | 5.53 |
| Zn(pydc)·2H <sub>2</sub> O | 31.31 | 3.38 | 5.22 |

**Table S2** Weight loss percentages for the as-prepared Zn-CPs.

| Zn-CPs                     | Weight (%) |           |
|----------------------------|------------|-----------|
|                            | 25–250 °C  | 25–700 °C |
| Zn-CP-1                    | 12         | 68.7      |
| Zn-CP-2                    | 12.5       | 65.8      |
| Zn-CP-3                    | 12.2       | 63.9      |
| Zn(pydc)·2H <sub>2</sub> O | 13.42      | 69.69     |
